# Supplementary material
Source: publisher figshare collection journal article supplement (https://sage.figshare.com/ndownloader/files/39664630)
Supplement: Supplementary file 1 [file 39664630]

* Encoding: UTF-8.

DATASET ACTIVATE DataSet1.

**DEMGRAPHICS**

FREQUENCIES VARIABLES=Gender
  /ORDER=ANALYSIS.

DESCRIPTIVES VARIABLES=Age
  /STATISTICS=MEAN STDDEV RANGE MIN MAX.


FREQUENCIES VARIABLES=Ulevel
  /ORDER=ANALYSIS.

FREQUENCIES VARIABLES=Ethnicity
  /ORDER=ANALYSIS.

FREQUENCIES VARIABLES=Mstatus
  /ORDER=ANALYSIS.

***DESCRIPTIVE STATISTICS OF STUDY VARIABLES***
    

DESCRIPTIVES VARIABLES=NRS_1_unpleasant NRS_1_intense NRS_1_worried NRS_1_concerned 
    NRS_2_unpleasant NRS_2_intense NRS_2_worried NRS_2_concerned PTPQ_Total
  /STATISTICS=MEAN STDDEV RANGE MIN MAX.

DESCRIPTIVES VARIABLES=Paintolerance1 Paintolerance2
  /STATISTICS=MEAN STDDEV RANGE MIN MAX.

***PAIN OUTCOMES*****

***Pain Unpleasantness across Time and Condition**

GLM NRS_1_unpleasant NRS_2_unpleasant BY Condition
  /WSFACTOR=Time 2 Polynomial 
  /METHOD=SSTYPE(3)
  /POSTHOC=Condition(TUKEY) 
  /EMMEANS=TABLES(OVERALL) 
  /EMMEANS=TABLES(Condition) COMPARE ADJ(LSD)
  /EMMEANS=TABLES(Time) COMPARE ADJ(LSD)
  /EMMEANS=TABLES(Condition*Time) COMPARE(Condition) ADJ(LSD)
  /EMMEANS=TABLES(Condition*Time) COMPARE(Time) ADJ(LSD)
  /PRINT=DESCRIPTIVE ETASQ 
  /CRITERIA=ALPHA(.05)
  /WSDESIGN=Time 
  /DESIGN=Condition.


***Pain Intensity across Time and Condition****

GLM NRS_1_intense NRS_2_intense BY Condition
  /WSFACTOR=Time 2 Polynomial 
  /METHOD=SSTYPE(3)
  /POSTHOC=Condition(TUKEY) 
  /EMMEANS=TABLES(OVERALL) 
  /EMMEANS=TABLES(Condition) COMPARE ADJ(LSD)
  /EMMEANS=TABLES(Time) COMPARE ADJ(LSD)
  /EMMEANS=TABLES(Condition*Time) COMPARE(Condition) ADJ(LSD)
  /EMMEANS=TABLES(Condition*Time) COMPARE(Time) ADJ(LSD)
  /PRINT=DESCRIPTIVE ETASQ 
  /CRITERIA=ALPHA(.05)
  /WSDESIGN=Time 
  /DESIGN=Condition.

***Pain Intolerance across Time and Condition****

GLM Paintolerance1 Paintolerance2 BY Condition
  /WSFACTOR=Time 2 Polynomial 
  /METHOD=SSTYPE(3)
  /POSTHOC=Condition(TUKEY) 
  /EMMEANS=TABLES(OVERALL) 
  /EMMEANS=TABLES(Condition) COMPARE ADJ(LSD)
  /EMMEANS=TABLES(Time) COMPARE ADJ(LSD)
  /EMMEANS=TABLES(Condition*Time) COMPARE(Condition) ADJ(LSD)
  /EMMEANS=TABLES(Condition*Time) COMPARE(Time) ADJ(LSD)
  /PRINT=DESCRIPTIVE ETASQ 
  /CRITERIA=ALPHA(.05)
  /WSDESIGN=Time 
  /DESIGN=Condition.

***Perceived Threat of Pain across condition***

UNIANOVA PTPQ_Total BY Condition
  /METHOD=SSTYPE(3)
  /INTERCEPT=INCLUDE
  /POSTHOC=Condition(TUKEY) 
  /CRITERIA=ALPHA(0.05)
  /DESIGN=Condition.

***AFFECTIVE OUTCOMES***
    
***Worry across Time and Condition***

GLM NRS_1_worried NRS_2_worried BY Condition
  /WSFACTOR=Time 2 Polynomial 
  /METHOD=SSTYPE(3)
  /POSTHOC=Condition(TUKEY) 
  /EMMEANS=TABLES(OVERALL) 
  /EMMEANS=TABLES(Condition) COMPARE ADJ(LSD)
  /EMMEANS=TABLES(Time) COMPARE ADJ(LSD)
  /EMMEANS=TABLES(Condition*Time) COMPARE(Condition) ADJ(LSD)
  /EMMEANS=TABLES(Condition*Time) COMPARE(Time) ADJ(LSD)
  /PRINT=DESCRIPTIVE ETASQ 
  /CRITERIA=ALPHA(.05)
  /WSDESIGN=Time 
  /DESIGN=Condition.

**Concern across TIme and Condition ***

GLM NRS_1_concerned NRS_2_concerned BY Condition
  /WSFACTOR=Time 2 Polynomial 
  /METHOD=SSTYPE(3)
  /POSTHOC=Condition(TUKEY) 
  /EMMEANS=TABLES(OVERALL) 
  /EMMEANS=TABLES(Condition) COMPARE ADJ(LSD)
  /EMMEANS=TABLES(Time) COMPARE ADJ(LSD)
  /EMMEANS=TABLES(Condition*Time) COMPARE(Condition) ADJ(LSD)
  /EMMEANS=TABLES(Condition*Time) COMPARE(Time) ADJ(LSD)
  /PRINT=DESCRIPTIVE ETASQ 
  /CRITERIA=ALPHA(.05)
  /WSDESIGN=Time 
  /DESIGN=Condition.
